# Supplementary material for: Unparalleled Armour for Aramid Fiber with Excellent UV Resistance in Extreme Environment
Source: PubMed Central journal article supplement (PMC8224419; doi:10.1002/advs.202004171), 2021-05-06
Supplement: ADVS-8-2004171-s001.pdf [file ADVS-8-2004171-s001.pdf]

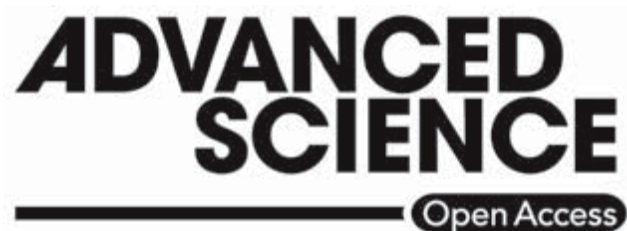

## Supporting Information

for *Adv. Sci.*, DOI: 10.1002/advs.202004171

### Unparalleled Armor for Aramid Fiber with Excellent UV-Resistance in Extreme Environment

*Fengxiang Chen, Lisha Zhai, Huiyu Yang, Shichao Zhao, Zonglei Wang, Chong Gao, Jingyi Zhou, Xin Liu, Zhenwei Yu\*, Yong Qin\*, Weilin Xu\**

Supporting Information

**Unparalleled Armor for Aramid Fiber with Excellent UV-Resistance in Extreme Environment**

*Fengxiang Chen, Lisha Zhai, Huiyu Yang, Shichao Zhao, Zonglei Wang, Chong Gao, Jingyi Zhou, Xin Liu, Zhenwei Yu\*, Yong Qin\*, Weilin Xu\**

Fengxiang Chen, Lisha Zhai, Huiyu Yang, Zonglei Wang, Chong Gao, Jingyi Zhou, Xin Liu, Prof. Weilin Xu

State Key Laboratory of New Textile Materials and Advanced Processing Technologies, Wuhan Textile University, Wuhan 430200 PR China

E-mail: weilin\_xu@wtu.edu.cn

Fengxiang Chen, Zhenwei Yu

Beijing Advanced Innovation Center for Biomedical Engineering and Key Laboratory of Bio-inspired Smart Interfacial Science and Technology of Ministry of Education, School of Chemistry, Beihang University, Beijing 100191, PR China

E-mail: zw\_yu@buaa.edu.cn

Fengxiang Chen

State Key Laboratory of Bio-Fibers and Eco-Textiles, Qingdao University, Qingdao 266071, P.R. China.

Shichao Zhao, Prof. Yong Qin

State Key Laboratory of Coal Conversion, Institute of Coal Chemistry, Chinese Academy of Science, Taiyuan 030001, PR China

E-mail: qinyong@sxicc.ac.cn

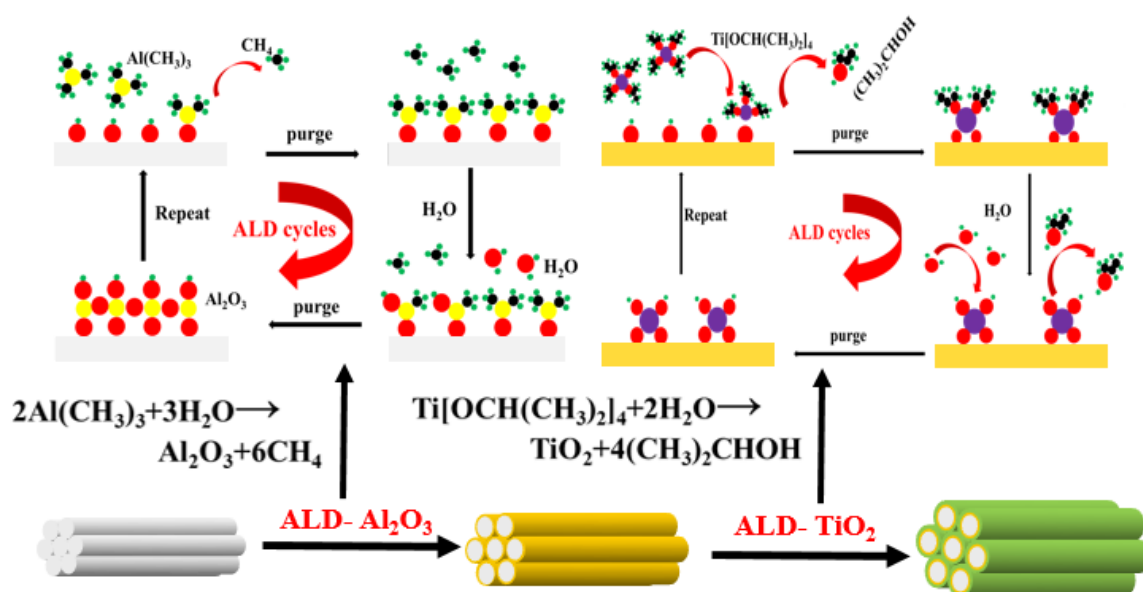

**Figure S1.** Schematic process of ALD  $\text{TiO}_2$  and  $\text{Al}_2\text{O}_3$  coating on PMIA surface in sequence.

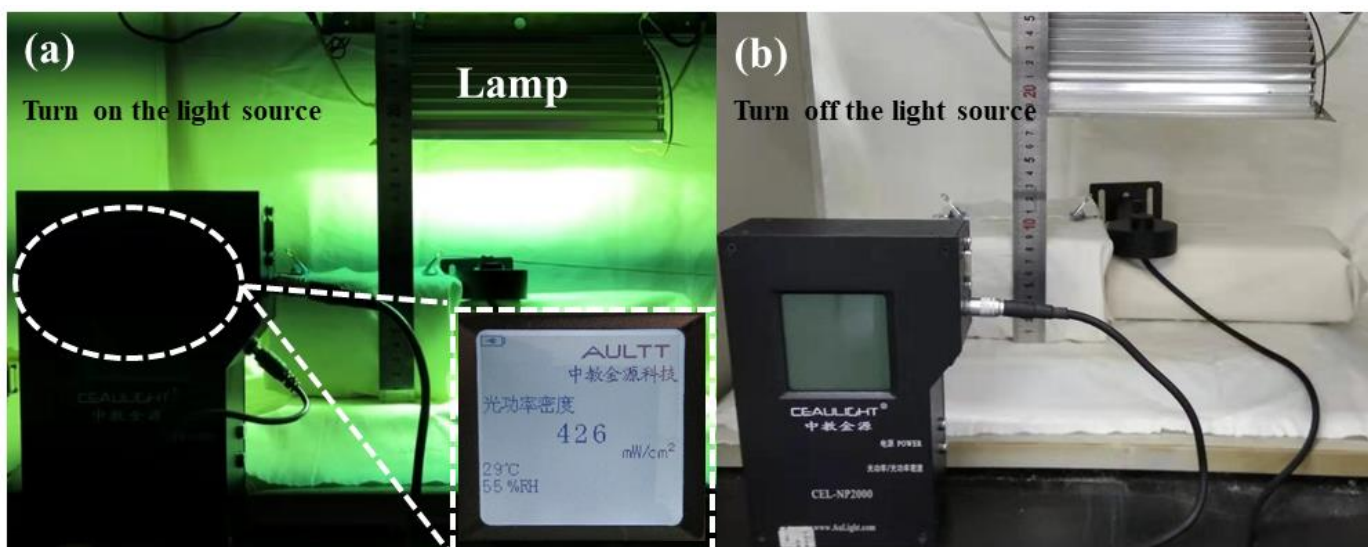

Figure S2. Light intensity during the test.

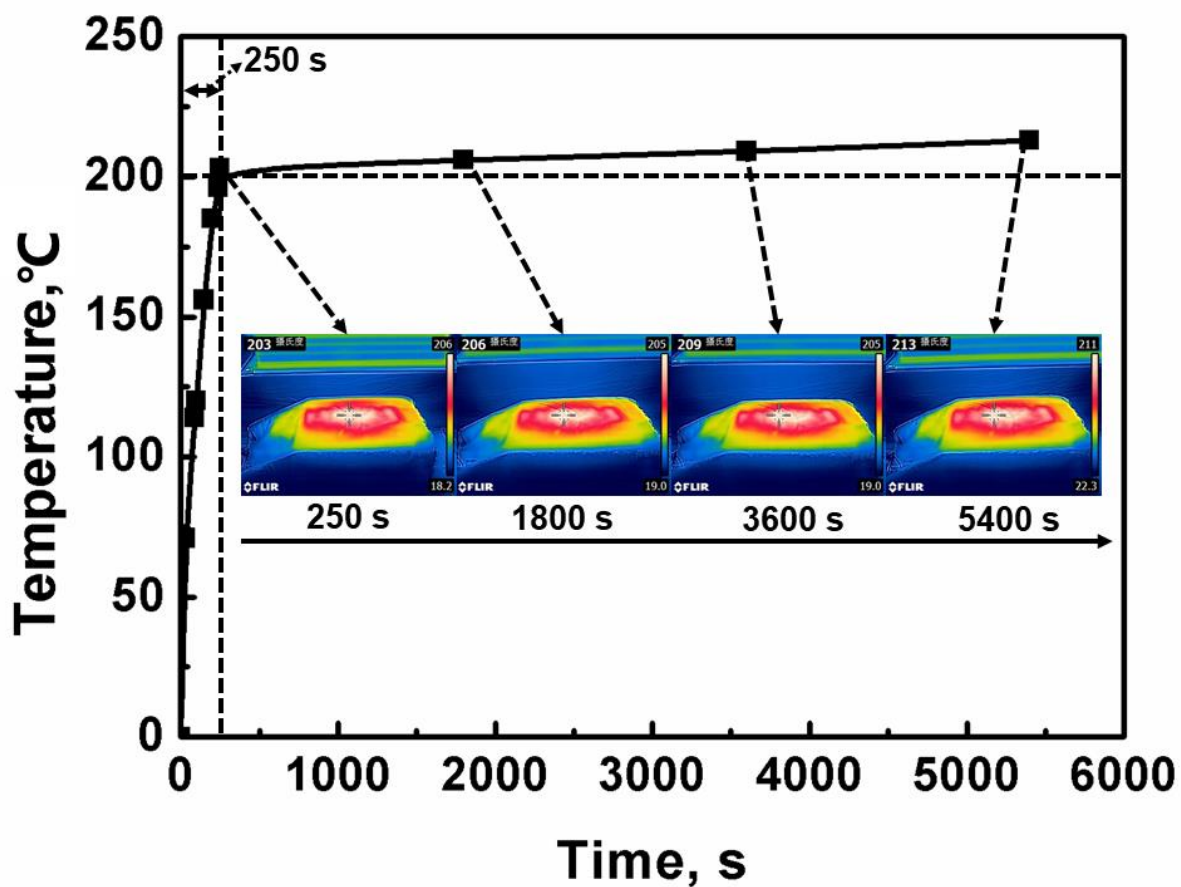

Figure S3. Ambient temperature as a function of the times. The insets are the corresponding thermal image at different times.

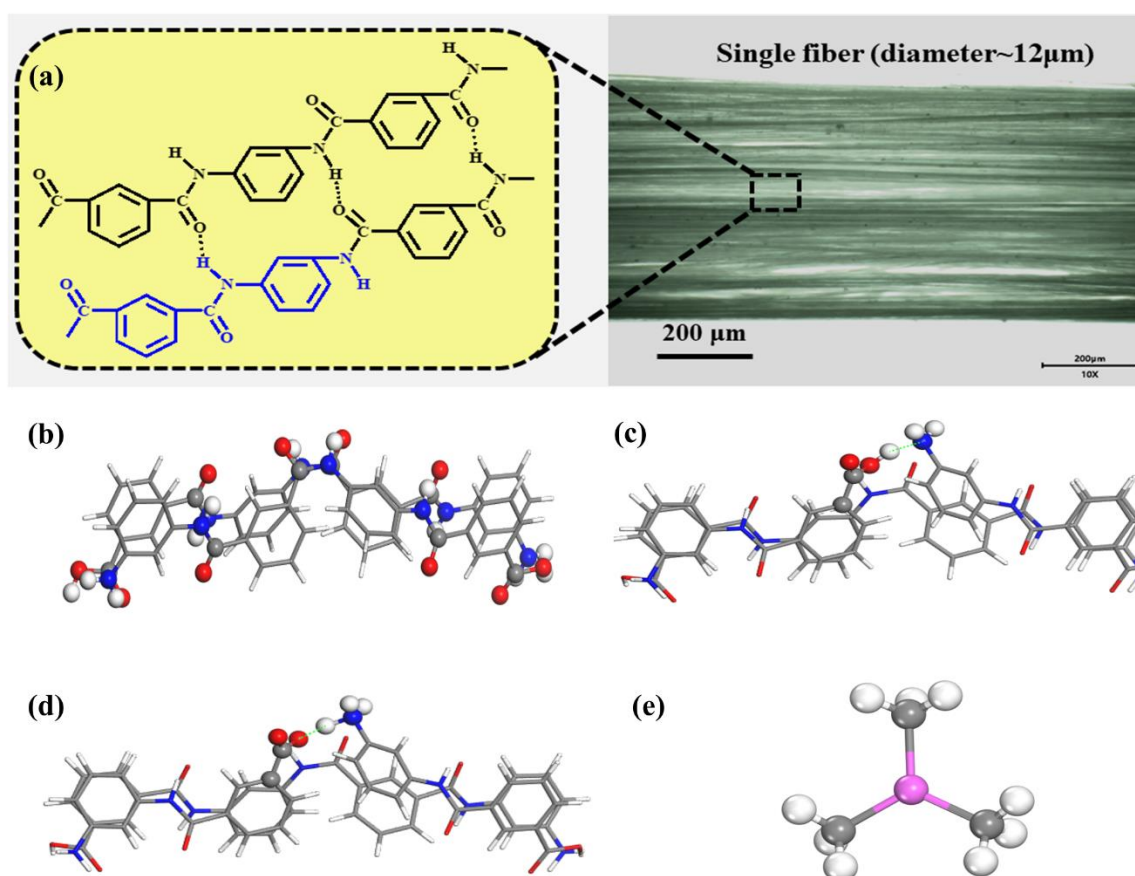

**Figure S4.** The optic microscope photo, ideal internal molecular structure and computational models of PMIA with the different chemical bond link state. (a) The optic microscope photo and internal molecular structure; Computational models of PMIA (b) with the two chemical bond states, the -COOH/-NH<sub>2</sub> (state I, c) groups and -

COO<sup>-</sup>/NH<sub>3</sub><sup>+</sup> (state II, d) groups, derived from the contact and infiltration of ALD precursor and then breakage of -CO-NH-group on the surface and inside of PMIA organic segment by a modified ALD and (e) Cluster model of Al(CH<sub>3</sub>)<sub>3</sub>. In these, C, O, N, H and Al are shown as grey, red, blue, white and purple spheres. Benzene fragments in the organic chain are shown as stick for clarity.

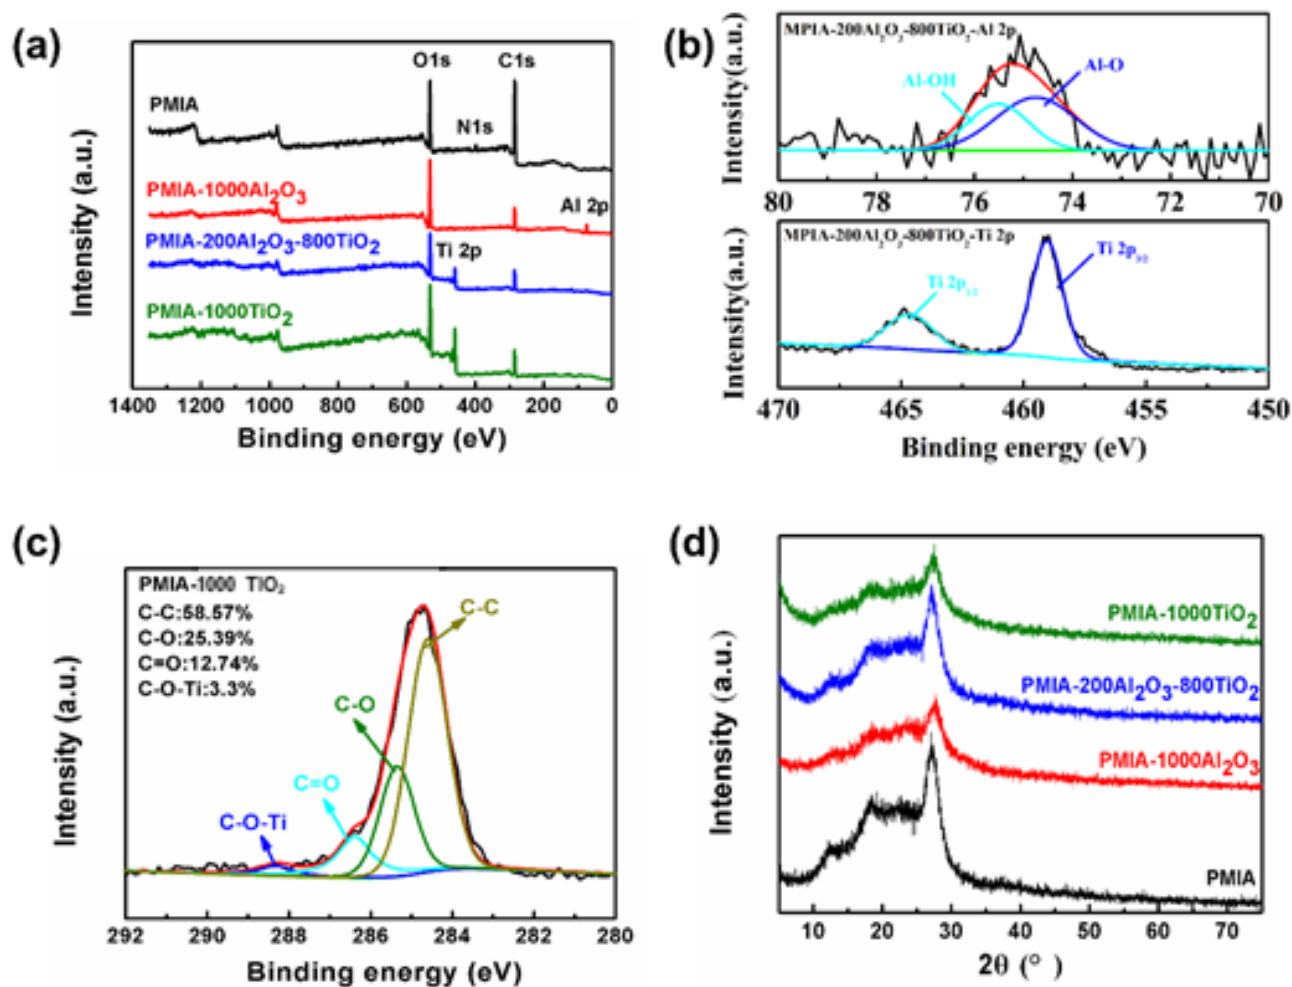

**Figure S5.** XPS and XRD spectrum bare PMIA and the ALD-coated PMIA. (a) XPS spectrum bare PMIA and the ALD-coated PMIA, (b) high-resolution XPS spectra of C 1s of the bare PMIA and the ALD-coated PMIA, (c) XPS peak spectrum of Al 2p and Ti 2p for PMIA-200Al<sub>2</sub>O<sub>3</sub>-800TiO<sub>2</sub> and (d) XRD of the bare PMIA and the ALD-coated PMIA.

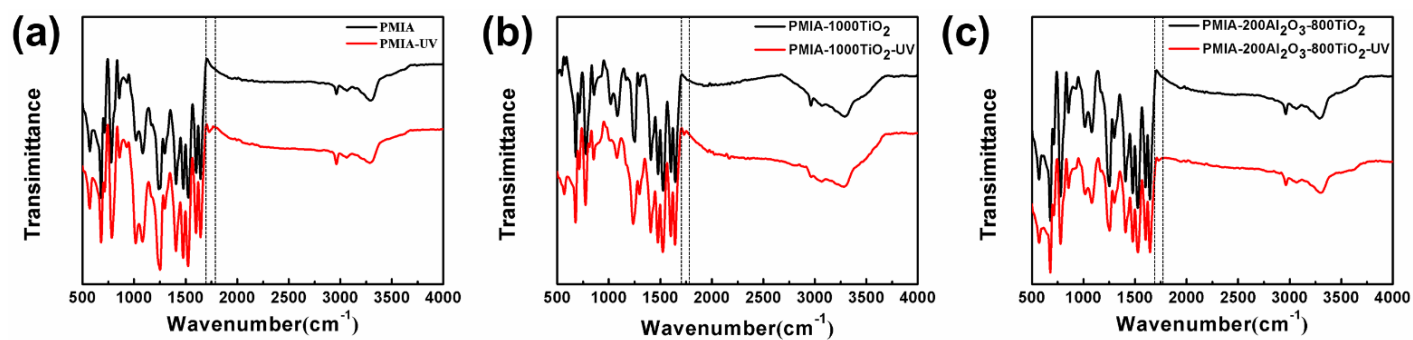

**Figure S6.** FT-IR spectrum of bare PMIA (a), PMIA-1000TiO<sub>2</sub> (b), and PMIA-200Al<sub>2</sub>O<sub>3</sub>-800TiO<sub>2</sub> (c) before and after UV radiation for 90 min.

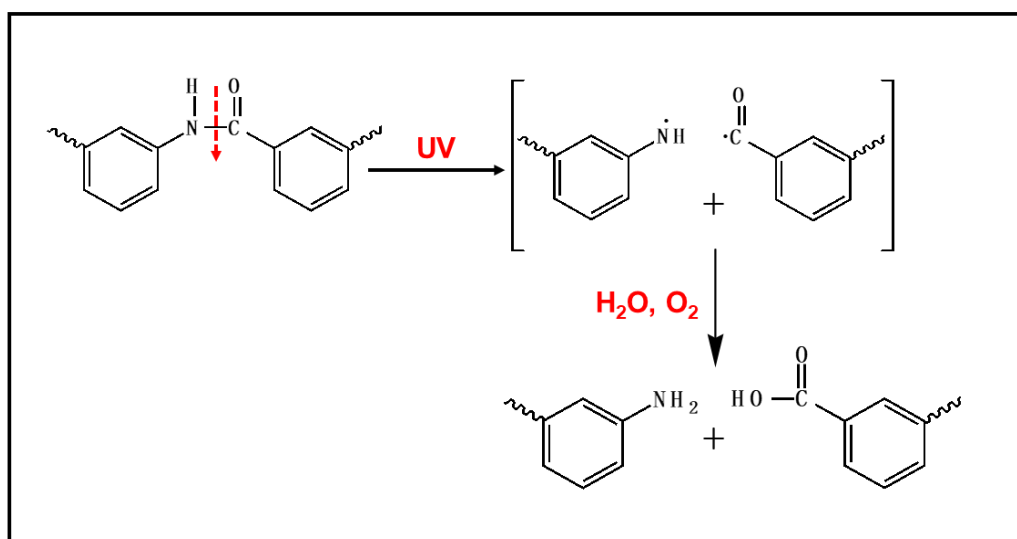

**Figure S7.** Proposition of the schematic representation of the possible mechanics of photoaging of PMIA fiber.

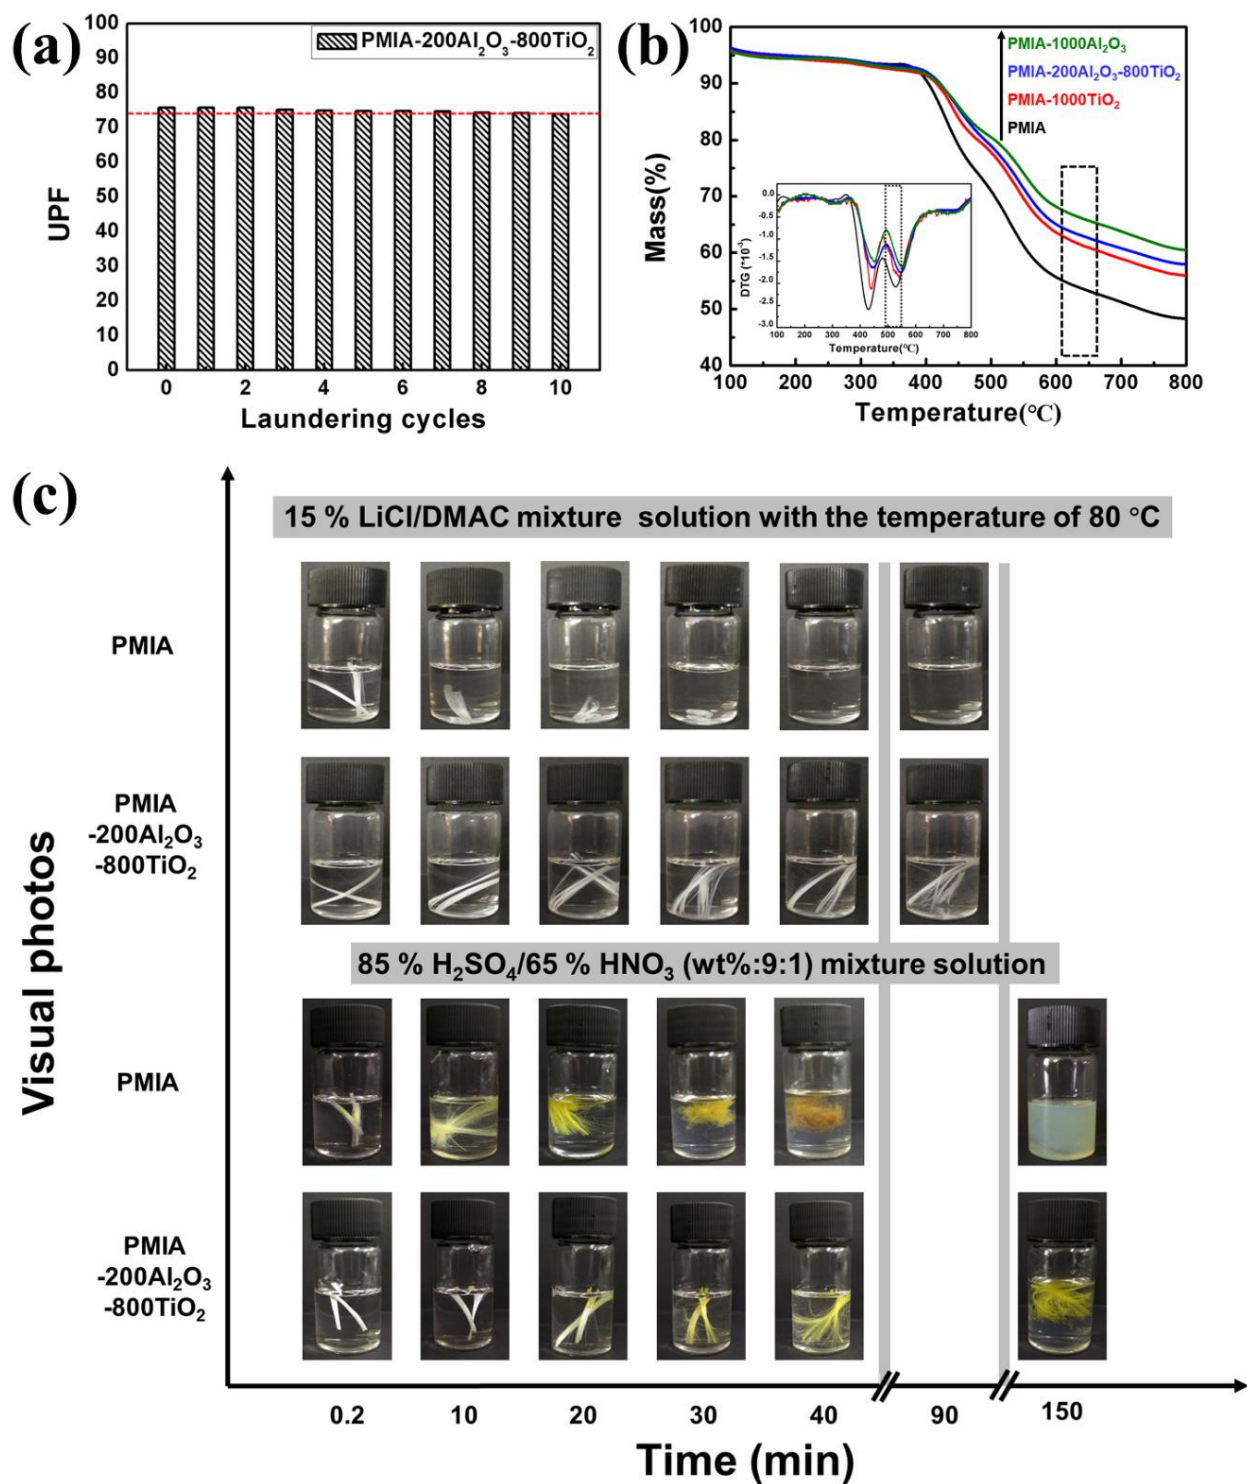

**Figure S8.** (a) UPF value of PMIA-200Al<sub>2</sub>O<sub>3</sub>-800TiO<sub>2</sub> after different cycles of laundering durability test; (b) TGA curves for the bare PMIA and the ALD-coated PMIA, the insert is the DTG curves of the bare PMIA and ALD-coated PMIA; (c) Chemical stability of the bare PMIA and PMIA-200Al<sub>2</sub>O<sub>3</sub>-800TiO<sub>2</sub> in 15 % LiCl/DMAC mixture solution with the temperature of 80 °C (Top) and 85 % H<sub>2</sub>SO<sub>4</sub>/65 % HNO<sub>3</sub> (wt%:9:1) mixture solution (Bottom).



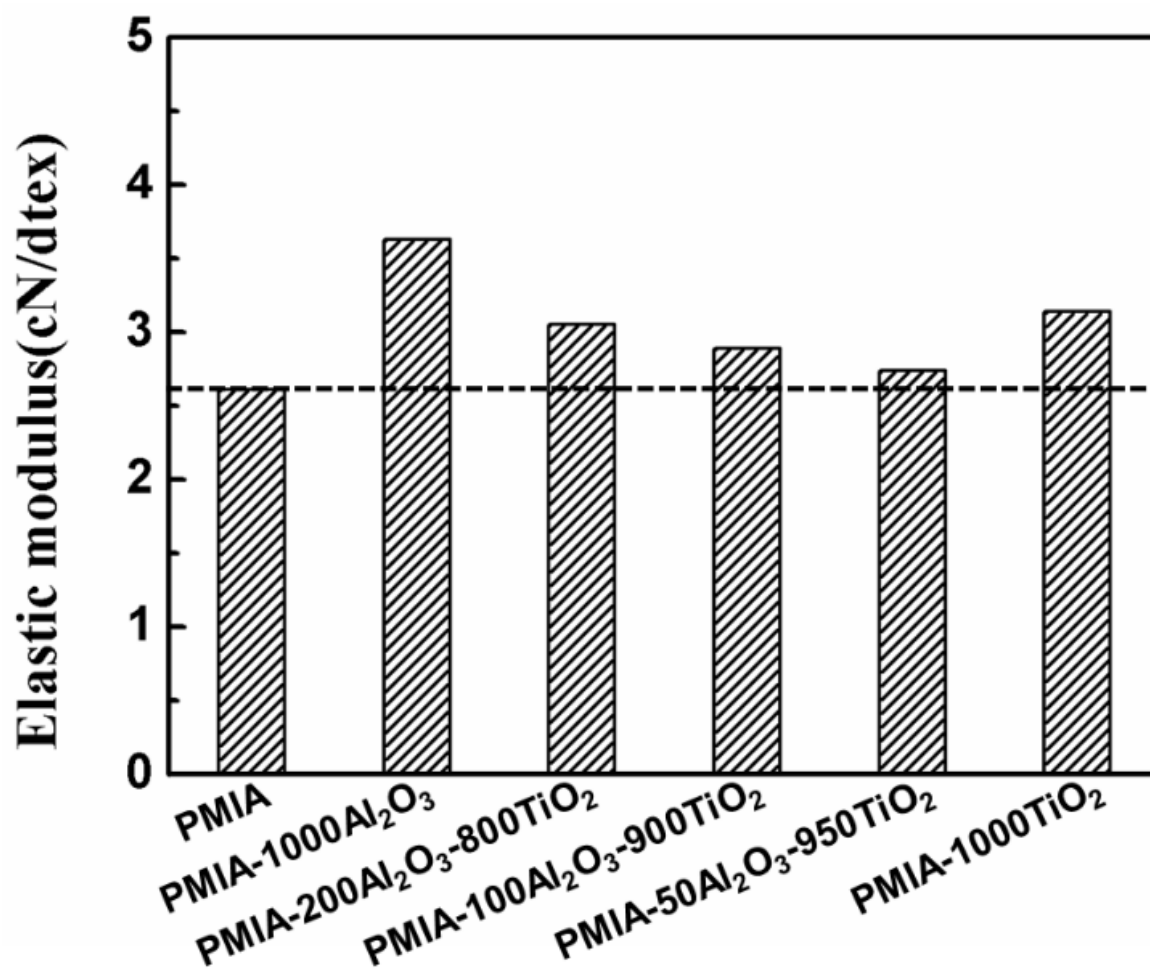

Figure S9. Elastic modulus of PMIA and ALD-coated PMIA.

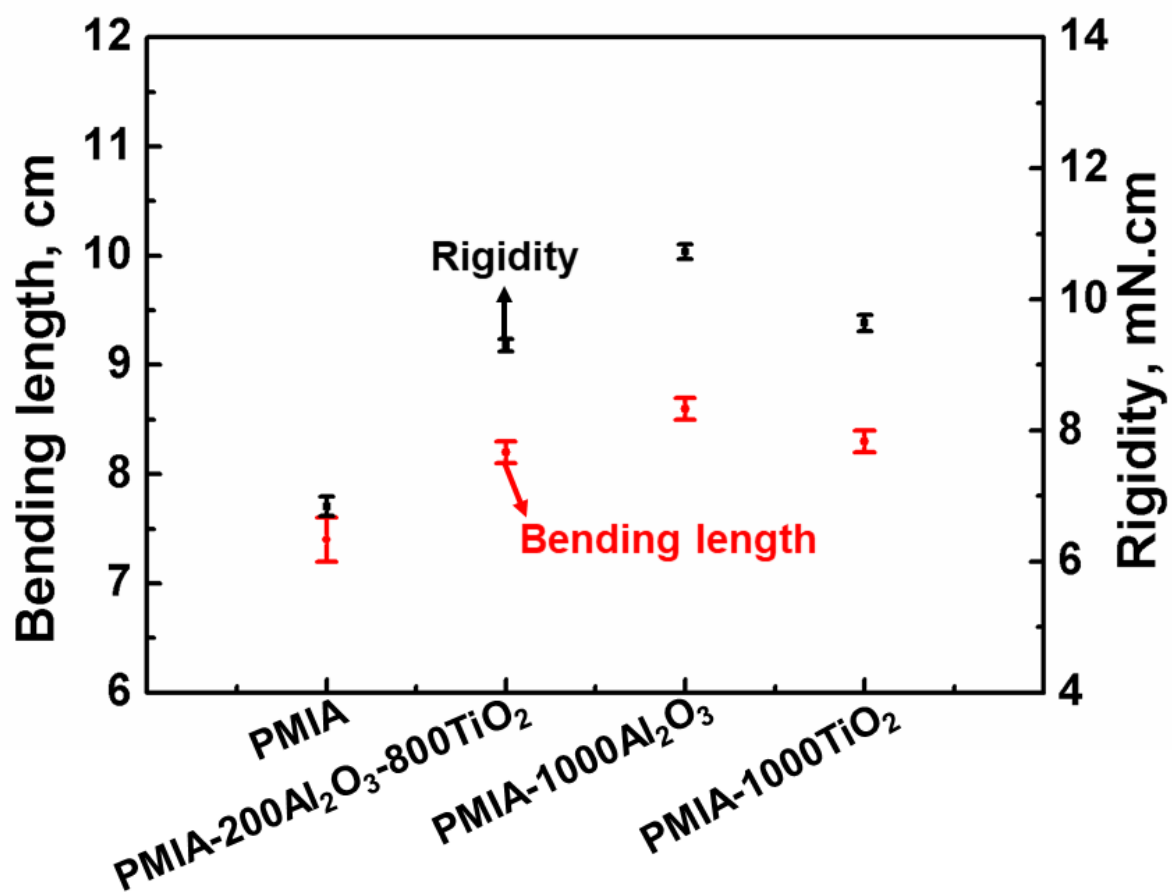

**Figure S10.** Bending length and rigidity of PMIA and ALD-coated PMIA.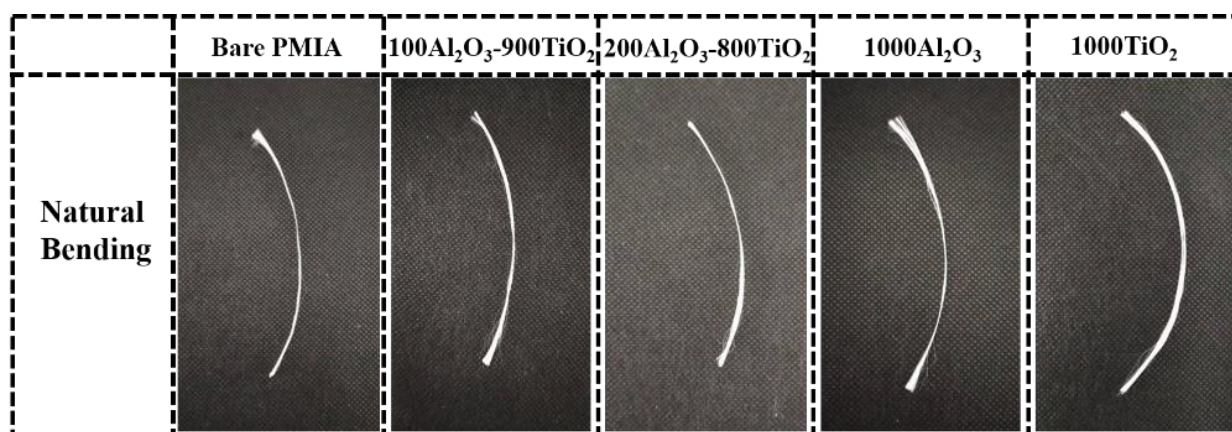**Figure S11.** The flexibility of the bare PMIA and the ALD-coated PMIA.

Table S1

Table S1. Add-on amount of MPIA after ALD treatment.

| Sample                                                      | Add-on amount (%) |
|-------------------------------------------------------------|-------------------|
| MPIA                                                        | /                 |
| MPIA-1000Al <sub>2</sub> O <sub>3</sub>                     | 7.09%             |
| MPIA-200Al <sub>2</sub> O <sub>3</sub> -800TiO <sub>2</sub> | 7.96%             |
| MPIA-100Al <sub>2</sub> O <sub>3</sub> -900TiO <sub>2</sub> | 8.27%             |
| MPIA-50Al <sub>2</sub> O <sub>3</sub> -950TiO <sub>2</sub>  | 8.43%             |
| MPIA-1000TiO <sub>2</sub>                                   | 8.51%             |



Table S2

Table S2 Mechanical properties of PMIA before and after ultraviolet radiation

| Samples                                                        | Before UV irradiation |            | UV irradiation for 30 min |            | UV irradiation for 60 min |            | UV irradiation for 90 min |            |
|----------------------------------------------------------------|-----------------------|------------|---------------------------|------------|---------------------------|------------|---------------------------|------------|
|                                                                | Tensile               | Strain,%   | Tensile                   | Strain,%   | Tensile                   | Strain,%   | Tensile                   | Strain,%   |
|                                                                | Stress, cN            |            | Stress, cN                |            | Stress, cN                |            | Stress, cN                |            |
| PMIA                                                           | 8.28±0.84             | 17.75±1.45 | 7.16±0.86                 | 15.75±1.34 | 6.15±0.52                 | 13.14±1.21 | 5.89±0.38                 | 11.17±0.97 |
| PMIA-Heated                                                    | 7.74±0.76             | 16.52±1.32 | 6.58±0.68                 | 14.89±1.36 | 5.62±0.44                 | 12.46±1.24 | 5.36±0.46                 | 10.68±1.18 |
| PMIA-50Al <sub>2</sub> O <sub>3</sub>                          | 7.85±0.83             | 16.53±1.46 | 7.56±0.72                 | 14±1.23    | 6.94±0.61                 | 12.65±1.27 | 6.16±0.42                 | 11.85±1.14 |
| PMIA-100Al <sub>2</sub> O <sub>3</sub>                         | 8.58±0.90             | 18.05±1.64 | 8.06±0.91                 | 16.46±1.45 | 7.66±0.63                 | 14.54±1.22 | 7.31±0.53                 | 13.59±1.08 |
| PMIA-200Al <sub>2</sub> O <sub>3</sub>                         | 9.63±0.87             | 18.72±1.51 | 8.94±0.63                 | 17.8±1.48  | 8.08±0.61                 | 17.16±1.31 | 7.53±0.57                 | 15.92±1.22 |
| PMIA-1000Al <sub>2</sub> O <sub>3</sub>                        | 9.92±0.88             | 19.64±1.62 | 9.05±0.77                 | 18.41±1.52 | 8.25±0.72                 | 17.37±1.30 | 7.62±0.48                 | 16.14±1.17 |
| PMIA-200Al <sub>2</sub> O <sub>3</sub><br>-800TiO <sub>2</sub> | 9.90±0.89             | 19.14±1.65 | 9.1±0.92                  | 18.65±1.37 | 8.72±0.65                 | 17.53±1.31 | 8.21±0.62                 | 16.93±1.18 |
| PMIA-100Al <sub>2</sub> O <sub>3</sub><br>-900TiO <sub>2</sub> | 10.12±0.94            | 20.2±1.71  | 9.32±0.95                 | 19.19±1.51 | 9±0.84                    | 18.53±1.34 | 8.49±0.58                 | 17.86±1.25 |
| PMIA-50Al <sub>2</sub> O <sub>3</sub><br>-950TiO <sub>2</sub>  | 10.43±0.97            | 21.61±1.53 | 9.54±0.73                 | 20.61±1.48 | 9.1±0.81                  | 19.42±1.25 | 8.77±0.81                 | 18.77±1.38 |
| PMIA-1000TiO <sub>2</sub>                                      | 10.77±1.05            | 22.41±1.68 | 9.34±0.84                 | 20.32±1.47 | 8.43±0.72                 | 17.46±1.36 | 7.73±0.47                 | 16.32±1.29 |

Table S3

**Table S3** TGA and DTG results and the residual weight ratio of PMIA before and after ALD coating

| Sample                                                      | Peak1     | Peak2     | $Y_c$ at 800°C (%) |
|-------------------------------------------------------------|-----------|-----------|--------------------|
|                                                             | Temp (°C) | Temp (°C) |                    |
| PMIA                                                        | 429.3     | 528       | 48.33              |
| PMIA-1000TiO <sub>2</sub>                                   | 438.6     | 540.8     | 55.95              |
| PMIA-200Al <sub>2</sub> O <sub>3</sub> -800TiO <sub>2</sub> | 445.4     | 546.3     | 57.94              |
| PMIA-1000Al <sub>2</sub> O <sub>3</sub>                     | 451.5     | 551.5     | 60.45              |
